# Supplementary material
Source: PubMed Central journal article supplement (PMC7171273)

# Shape Pre-Test

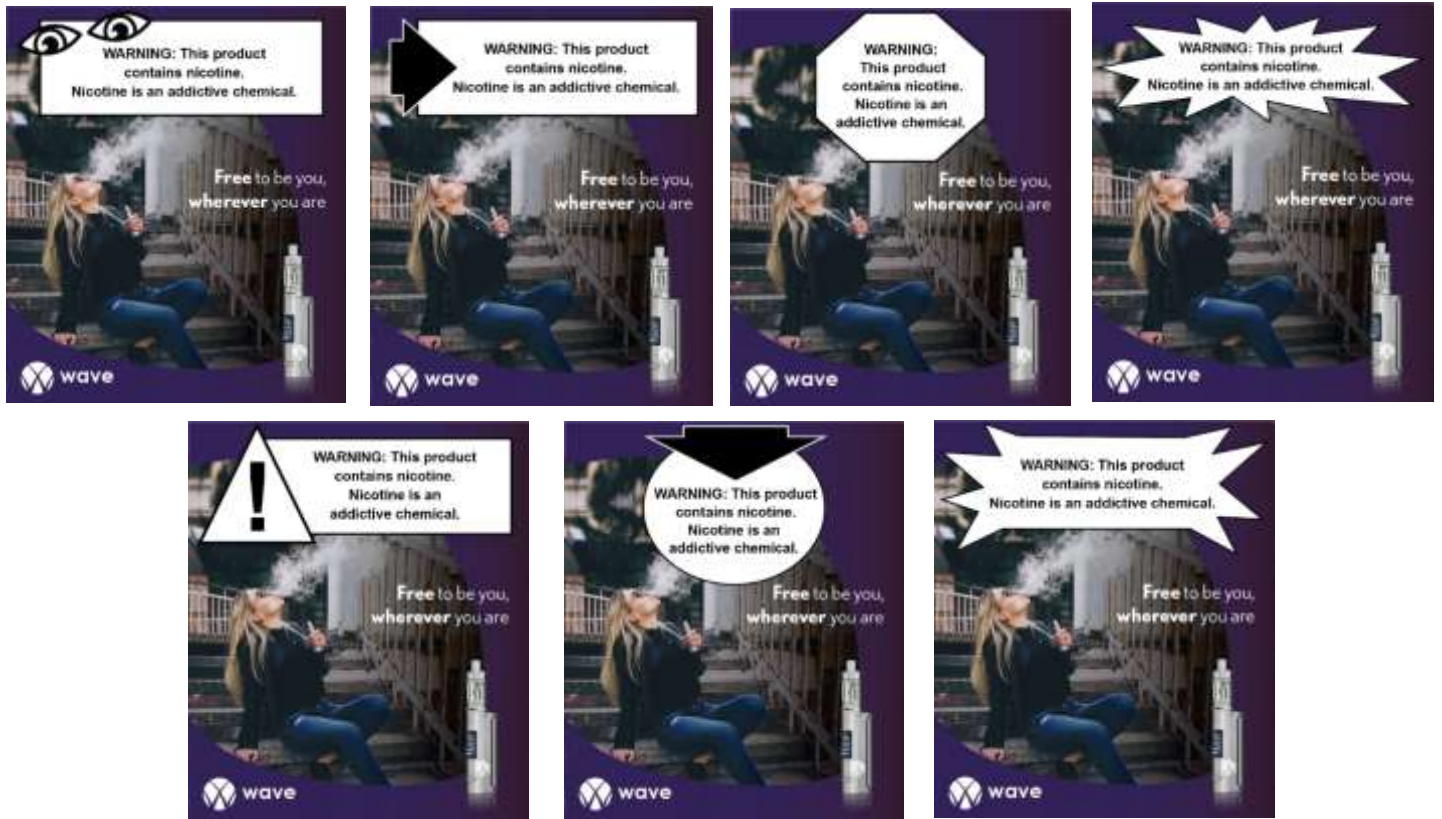

Which of the following best grabs your attention?

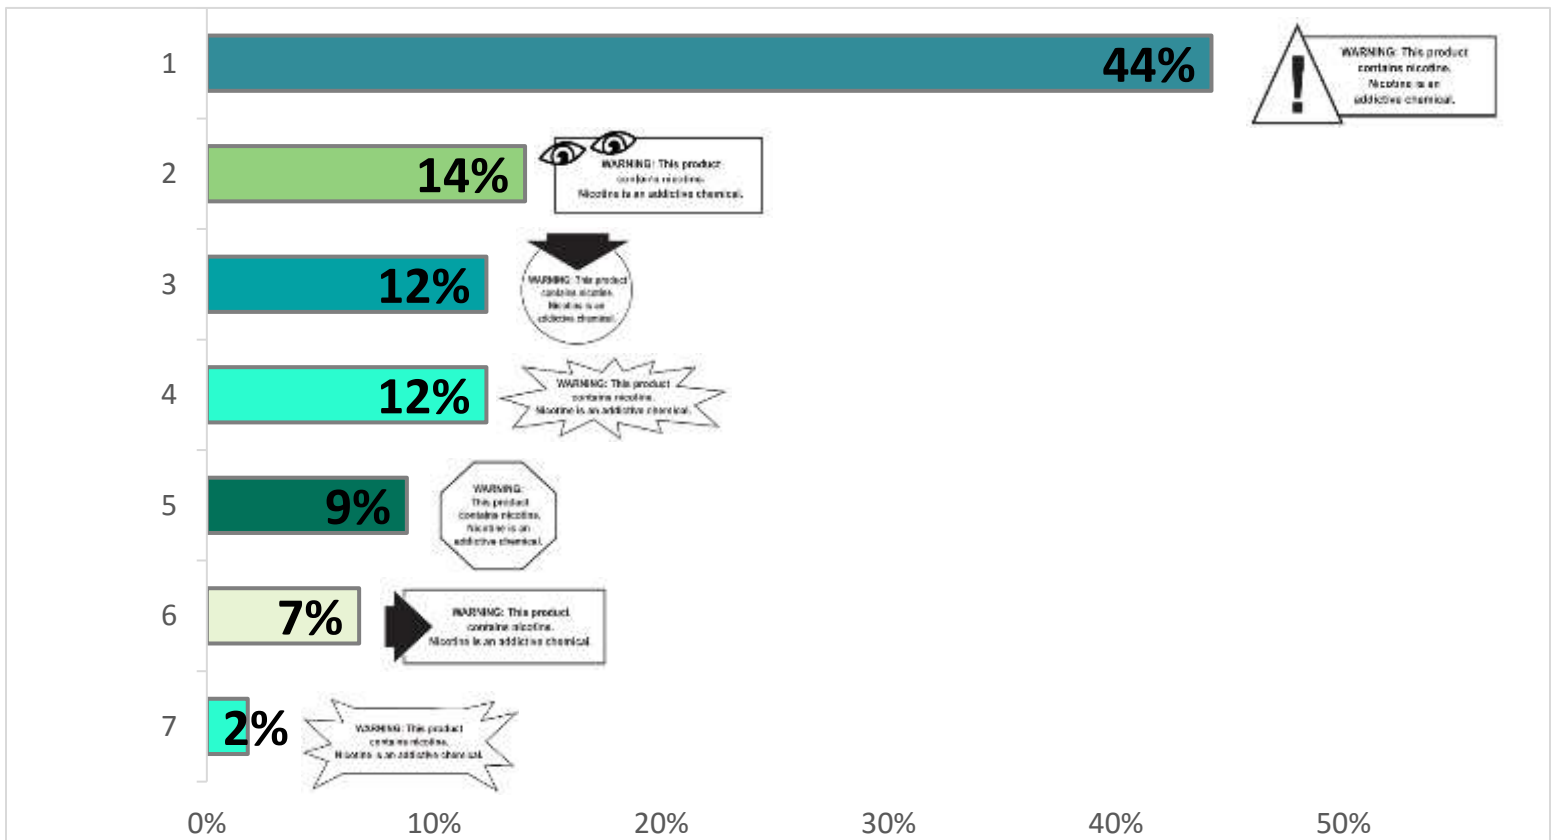

# Color Shade Pre-Test

**WARNING: This product contains nicotine. Nicotine is an addictive chemical.**

True Yellow

**WARNING: This product contains nicotine. Nicotine is an addictive chemical.**

Dark Yellow

**WARNING: This product contains nicotine. Nicotine is an addictive chemical.**

Light Yellow

**WARNING: This product contains nicotine. Nicotine is an addictive chemical.**

**WARNING: This product contains nicotine. Nicotine is an addictive chemical.**

**WARNING: This product contains nicotine. Nicotine is an addictive chemical.**

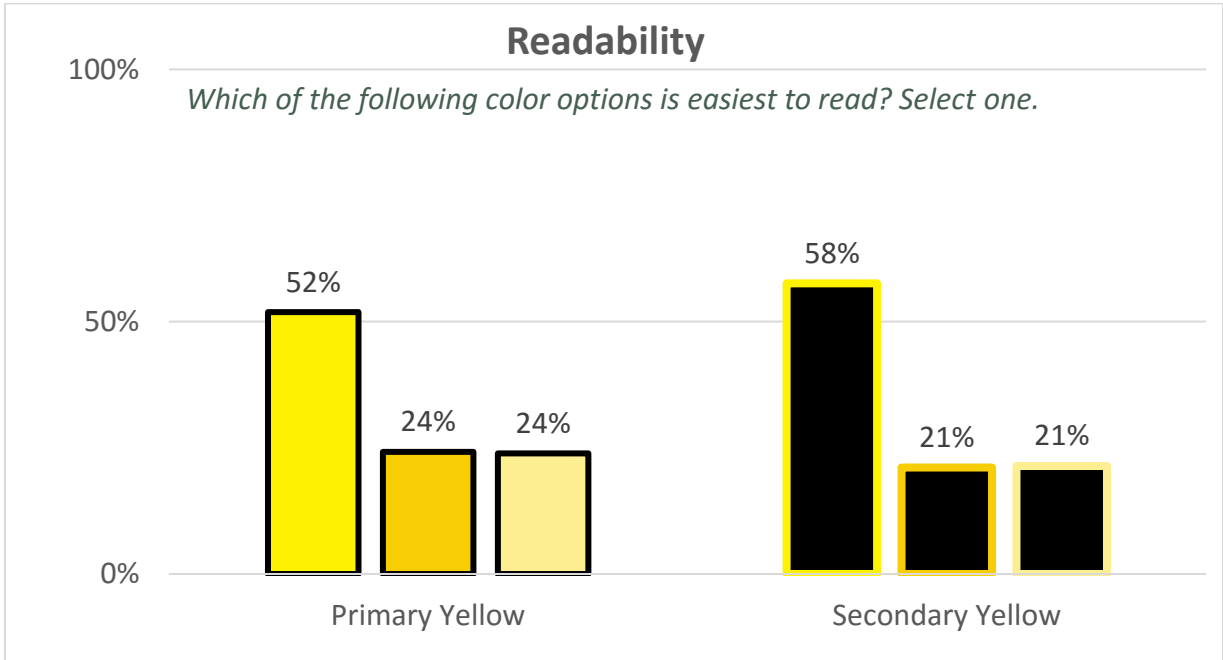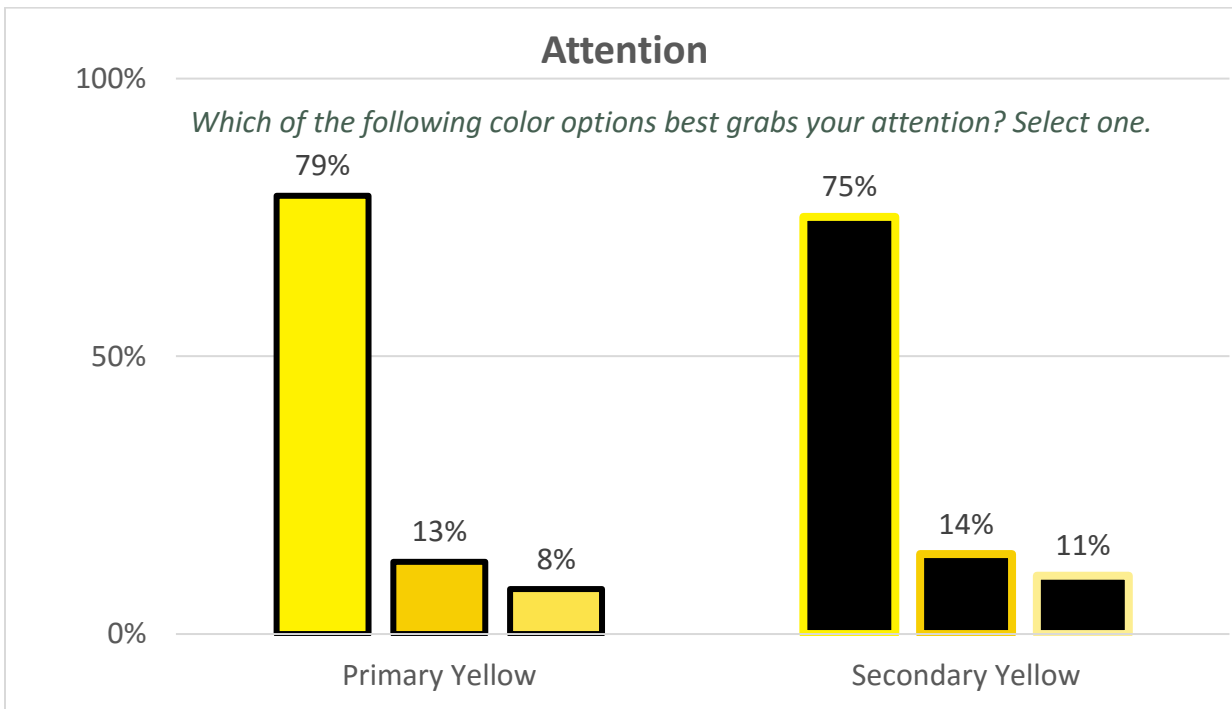

Supplement: ntz091_suppl_supplementary_material.pdf [file ntz091_suppl_supplementary_material.pdf]
